# Supplementary material for: Microstructural and Mechanical Evaluations of SAW By Manufactured Granular Basic Bonded Cr, Mo, and Cr-Mo Active Fluxes on ST37 Low Carbon Steel
Source: Research Square preprint supplement (doi:10.21203/rs.3.rs-167620/v1), 2021-02-12
Supplement: Supplementary file 1 [file f181fceee9557ec340d635b1.docx]

**Highlights**

- Granular Cr, Mo, and Cr-Mo active basic flux were manufactured by the unfused-bonded method.
- SAW was employed successfully on ST37 steel by bead on plate technique and active fluxes.
- Acicular ferrite formed by the assist of nonmetallic inclusion during welding, which improved mechanical properties, extremely.
- The inclusions characteristics and alloying elements transferred from flux into weld metal and slag also measured.
